1 **UNC-5 (UNC5) Regulates the Length and Number of Processes that *Caenorhabditis***  
2 ***elegans* Neurons Can Develop**

3

4 Gerard Limerick<sup>\*</sup> †, Xia Tang<sup>\*</sup> †, Won Suk Lee<sup>\*</sup> †, Ahmed Mohamed<sup>\*</sup>, Aseel Al-Aamiri<sup>\*</sup>, and  
5 William G. Wadsworth<sup>\*</sup>

6

7 <sup>\*</sup>Department of Pathology and Laboratory Medicine, Rutgers Robert Wood Johnson Medical  
8 School, Piscataway, NJ 08854

9

10 †These authors contributed equally to this work

11

12 running title: neuronal outgrowth patterning

13

14 key words: neuronal development, axon guidance, asymmetric localization, *Caenorhabditis*  
15 *elegans*, netrin and wnt signaling

16

17 corresponding author:

18 William G. Wadsworth

19 Department of Pathology and Laboratory Medicine

20 Rutgers Robert Wood Johnson Medical School

21 675 Hoes Lane West

22 Piscataway, NJ 08854-5635

23 732-235-5768

24 [william.wadsworth@rwjms.rutgers.edu](mailto:william.wadsworth@rwjms.rutgers.edu)

## 25 **Abstract**

26 Neurons extend processes that vary in number, length, and direction of outgrowth.  
27 Extracellular molecules act as cues to regulate this patterning. In *Caenorhabditis elegans*,  
28 neurons respond to the UNC-6 (netrin) cue via UNC-5 (UNC5) and UNC-40 (DCC)  
29 receptors. Here we present evidence that UNC-5 regulates the length and number of  
30 processes that neurons develop. Genetic analysis suggests UNC-5 functions with UNC-6  
31 and EGL-20 (wnt), the SAX-3 (Robo) receptor, and the cytoplasmic proteins UNC-53  
32 (NAV2), MIG-15 (NIK kinase), and MADD-2 (TRIM) to regulate the asymmetric localization  
33 of UNC-40 to a surface of the neuron. We have postulated that UNC-40 polarization is self-  
34 organizing and that the surface to which UNC-40 localizes and mediates outgrowth is  
35 stochastically determined. At any instance of time, there is a probability that UNC-40-  
36 mediated outgrowth will occur in a specific direction. We find that UNC-5 activity reduces  
37 the degree to which the direction of outgrowth fluctuations over time. Random walk  
38 modeling predicts that by decreasing the fluctuation UNC-5 activity increases the mean-  
39 squared distance that outgrowth movement could cover over a given time. This suggests  
40 that UNC-5 activity creates outgrowth patterns by varying the rate of outgrowth along a  
41 surface of the neuron.

## 42 **Introduction**

43 During development, an intricate network of neuronal connections is established. As  
44 processes extend from the cell bodies of neurons distinct patterns of outgrowth emerge.  
45 Some extensions remain as a single process, whereas others branch and form multiple  
46 processes. If they branch, the extensions can travel in the same or in different directions.  
47 Processes vary in length. Extracellular cues are known to influence this patterning, but the  
48 underlying logic that govern the formation of patterns remains a mystery.

49

50 The secreted extracellular UNC-6 (netrin) molecule and its receptors, UNC-5 (UNC5) and  
51 UNC-40 (DCC) are highly conserved in invertebrates and vertebrates, and are known to  
52 play key roles in cell and axon migrations. In *Caenorhabditis elegans*, UNC-6 is produced by  
53 ventral cells and is thought to form a gradient with its highest concentration around the  
54 ventral midline (WADSWORTH *et al.* 1996; WADSWORTH AND HEDGECOCK 1996; ASAKURA *et al.*  
55 2007). It's been observed that neurons that express the receptor UNC-40 (DCC) extend  
56 axons ventrally, towards the UNC-6 sources; whereas neurons that express the receptor  
57 UNC-5 (UNC5) alone or in combination with UNC-40 extend axons dorsally, away from the  
58 UNC-6 sources (HEDGECOCK *et al.* 1990; LEUNG-HAGESTEIJN *et al.* 1992; CHAN *et al.* 1996;  
59 WADSWORTH *et al.* 1996).

60

61 It is thought that the function of UNC-5 (UNC5) in axon development is to mediate a  
62 repulsive response by the neuron to UNC-6 (netrin) (LEUNG-HAGESTEIJN *et al.* 1992; HONG *et*  
63 *al.* 1999; KELEMAN AND DICKSON 2001; MOORE *et al.* 2007). This drives outgrowth away from  
64 the UNC-6 (netrin) sources. However recent studies suggest that UNC-5 in *C. elegans* also  
65 plays a role in orienting outgrowth towards, and perpendicular, to the UNC-6 source. For

66 example, a synergistic interaction between UNC-5 and EGL-20 has been suggested for the  
67 guidance of AVM and PVM axons towards the UNC-6 source. In either *unc-5* or *egl-20*  
68 mutants the ventral extension of AVM and PVM axons is only slightly impaired, whereas in  
69 the double mutants there is a much greater penetrance (LEVY-STRUMPF AND CULOTTI 2014).  
70 EGL-20 (Wnt) is a secreted cue expressed from posterior sources (PAN *et al.* 2006). In the  
71 HSN neuron, both UNC-5 and EGL-20 affect to which surface the UNC-40 receptor will  
72 localize and, correspondingly, they affect the direction of HSN extension (KULKARNI *et al.*  
73 2013). Finally, in different genetic backgrounds UNC-5 has been observed to affect  
74 outgrowth along the anterior-posterior directions (LEVY-STRUMPF AND CULOTTI 2007; WATARI-  
75 GOSHIMA *et al.* 2007; LEVY-STRUMPF AND CULOTTI 2014; LEVY-STRUMPF *et al.* 2015; BHAT AND  
76 HUTTER 2016).

77

78 UNC-5 activity has also been implicated in axon branching and length of extension. We  
79 previously reported that loss of UNC-5 function, or of the receptor SAX-3 (Robo),  
80 suppresses branch formation that is induced by the expression of the N-terminal fragment of  
81 UNC-6, UNC-6 $\Delta$ C (LIM *et al.* 1999). A characteristic of the response that a neuron has to  
82 UNC-6 $\Delta$ C is that additional processes arise which are still guided by UNC-6 $\Delta$ C (LIM *et al.*  
83 1999). In other words, UNC-6 $\Delta$ C can trigger the formation of additional processes from a  
84 neuron without seriously compromising the guidance response that the neuron has to UNC-  
85 6 $\Delta$ C. A screen for mutations that suppress this patterning activity revealed that intercellular  
86 signaling pathways regulate the ability of UNC-6 $\Delta$ C to form new extension patterns (WANG  
87 AND WADSWORTH 2002). This observation indicates that the additional processes arise  
88 because the neuron's response to UNC-6 $\Delta$ C internally patterns new sites of outgrowth  
89 extension. UNC-5 and SAX-3 appear to regulate this signaling. In addition, we reported  
90 that the overextension of the PLM axon which occurs in *rpm-1* mutants can be suppressed

91 by loss of SAX-3 or UNC-5 function (Li *et al.* 2008). These branching and extension  
92 phenotypes are difficult to reconcile with the notion that the role of UNC-5 is simply to  
93 mediate repulsion away from UNC-6 sources, and they suggest that our understanding of  
94 UNC-5 function is incomplete.

95

96 In this paper, we show that UNC-5 regulates the length and number of extensions that  
97 neurons can form. We further present evidence indicating that UNC-5 (UNC5) functions  
98 together with UNC-6 (netrin) and EGL-20 (wnt), the SAX-3 (Robo) receptor, and the UNC-  
99 53 (NAV2), MIG-15 (NIK kinase), and MADD-2 (TRIM) cytoplasmic proteins to regulate  
100 UNC-40 asymmetric localization at a surface of the HSN neuron. Finally, we discuss how  
101 UNC-5 could control the length and number of extensions by regulating the asymmetric  
102 localization of UNC-40.

## 103 **Materials and Methods**

### 104 **Strains**

105 Strains were handled at 20 °C by using standard methods (Brenner, 1974) unless stated  
106 otherwise. A Bristol strain N2 was used as wild type. The following alleles were used: **LG I**,  
107 *unc-40(e1430)*, *unc-40(ur304)*, *zdl5[mec-4::GFP]*; **LG II**, *unc-53(n152)*; **LG IV**, *unc-5(e152)*,  
108 *unc-5(e53)*, *unc-5(ev480)*, *unc-5(ev585)*, *egl-20(n585)*, *kyls262[unc-86::myr-GFP;odr-*  
109 *1::dsRed]*; **LG IV**, *madd-2(ky592)*, *madd-2(tr103)*; **LG X**, *mig-15(rh148)*, *unc-6(ev400)*, *sax-*  
110 *3(ky123)*, *sax-3(ky200)*.

111 Transgenes maintained as extrachromosomal arrays included: *kyEx1212 [unc-86::unc-40-*  
112 *GFP;odr-1::dsRed]*.

113

### 114 **Analysis of axon outgrowth and cell body position**

115 HSN neurons were visualized using expression of the transgene *kyls262[unc-86::myr-GFP]*.  
116 The mechanosensory neurons, AVM, ALM, and PLM, were visualized using the expression  
117 of the transgene *zdl5[Pmec-4::GFP]*. Synchronized worms were obtained by allowing eggs  
118 to hatch overnight in M9 buffer without food. The larval stage was determined by using  
119 differential interference contrast (DIC) microscopy to examine the gonad cell number and  
120 gonad size. Staged nematodes larvae were mounted on a 5% agarose pad with 10 mM  
121 levamisole buffer. Images were taken using epifluorescent microscopy with a Zeiss 63X  
122 water immersion objective.

123

124 The number of process during early L1 larval stage was scored by counting the number of  
125 processes that extended for a distance greater than the length of one cell body. We report  
126 whether there were no such processes, one process or more than one processes. In the L2  
127 larval stage, a single early process was scored if there was only one major extension from

128 the ventral leading edge. The HSN cell body in L2 stage larvae was scored as dorsal if the  
129 cell body had failed to migrate ventrally and was not positioned near the PLM axon. In L4  
130 stage larvae, a multiple ventral processes phenotype was scored if more than one major  
131 extension protruded from the ventral side of cell body.

132

133 Extension into the nerve ring was scored as defective if the axon did not extend further than  
134 approximately half the width of the nerve ring. Anterior extension was scored as defective if  
135 the axon did not extend further anteriorly than the nerve ring. PLM axons are scored as  
136 over-extending if they extended further anterior than the position of the ALM cell body.

137

### 138 **Analysis of the direction of HSN outgrowth**

139 HSN was visualized using the transgene *kyIs262[unc-86::myr-GFP]*. L4 stage larvae were  
140 mounted on a 5% agarose pad with 10 mM levamisole buffer. An anterior protrusion was  
141 scored if the axon extended from the anterior side of the cell body for a distance greater  
142 than the length of three cell bodies. A dorsal or posterior protrusion was scored if the axon  
143 extended dorsally or posteriorly for a distance greater than two cell body lengths. The HSN  
144 was considered multipolar if more than one process extended a length greater than one cell  
145 body. Images were taken using epifluorescent microscopy with a Zeiss 40X objective.

146

### 147 **Analysis of the UNC-40::GFP localization in L2 stage animal**

148 For analysis of UNC-40::GFP localization, L2 stage larvae with the transgenic marker  
149 *kyEx1212[unc-86::unc-40::GFP; odr-1::dsRed]* were mounted on a 5% agarose pad with 10  
150 mM levamisole buffer. Staging was determined by examining the gonad cell number and  
151 gonad size under differential interference contrast (DIC) microscopy. Images were taken  
152 using epifluorescent microscopy with a Zeiss 63X water immersion objective. The UNC-



153 40::GFP localization was determined by measuring the average intensity under lines drawn  
154 along the dorsal and ventral edges of each HSN cell body by using ImageJ software. For  
155 analysis of the anterior–posterior orientation of UNC-40::GFP, the dorsal segment was  
156 geometrically divided into three equal lengths (dorsal anterior, dorsal central and dorsal  
157 posterior segments). The line-scan intensity plots of each of these segments were recorded.  
158 ANOVA test was used to determine if there is a significant difference between intensities of  
159 three segments. The dorsal distribution was considered uniform if  $p \geq 0.05$  and was  
160 considered asymmetrical if  $p \leq 0.05$ . Within an asymmetric population, the highest percent  
161 intensity was considered to localize UNC-40::GFP to either anterior, posterior or central  
162 domain of the dorsal surface.

163

## 164 **Computations**

165 A program to simulate a two-dimensional lattice random walk based on the probability of  
166 dorsal, ventral, anterior, and posterior outgrowth for a mutant (Table 1) was created using  
167 MATLAB. (The directions of the axons from multipolar neurons were not scored. These  
168 axons appear to behave the same as the axons from monopolar neurons, but this has not  
169 yet been tested.) The probability of dorsal, ventral, anterior, or posterior outgrowth was  
170 assigned for the direction of each step of a random walk moving up, down, left or right,  
171 respectively. Each variable is considered independent and identically distributed.  
172 Simulations of 500 equal size steps (size =1) were plotted for 50 tracks (Figure 1B and  
173 Figure 4 inserts). A Gaussian distribution for the final positions of the tracks was generated  
174 using Matlab's randn function (Figure 4).

175

176 The mean squared displacement (MSD) is used to provide a quantitative characteristic of  
177 the motion that would be created by the outgrowth activity undergoing the random walk.  
178 Using the random walks generated for a mutant the MSD can be calculated:

$$179 \quad msd(\tau) = \langle [r(t + \tau) - r(t)]^2 \rangle$$

180 Here,  $r(t)$  is the position at time  $t$  and  $\tau$  is the lag time between two positions used to  
181 calculate the displacement,  $\Delta r(\tau) = r(t+\tau) - r(t)$ . The time-average over  $t$  and the ensemble-  
182 average over the 50 trajectories were calculated. This yields the MSD as a function of the  
183 lag time. A coefficient giving the relative rate of diffusion was derived from a linear fit of the  
184 curve. The first two lag time points were not considered as the paths often approximate a  
185 straight line at short intervals.

## 186 **Results**

### 187 **UNC-5 regulates the pattern of outgrowth from the HSN neuron**

188 The HSN neuron is used to study how a neuron responds to extracellular guidance cues.

189 The HSN neuron sends a single axon to the ventral nerve cord, which is a source of the

190 UNC-6 cue (WADSWORTH *et al.* 1996; ADLER *et al.* 2006; ASAKURA *et al.* 2007). The

191 formation of the axon is dynamic (ADLER *et al.* 2006). Shortly after hatching HSN extends

192 short neurites in different directions. These neurites, which dynamically extend and retract

193 filopodia, become restricted to the ventral side of the neuron where a leading edge forms.

194 Multiple neurites extend from this surface until one develops into a single axon extending to

195 the ventral nerve cord. Extracellular GFP-tagged UNC-40 is observed to asymmetrically

196 localize (“cluster”) at the ventral side of HSN as the ventral leading edge forms (ADLER *et al.*

197 2006; XU *et al.* 2009; KULKARNI *et al.* 2013). UNC-40 receptor localization within the plasma

198 membrane can regulate the actin cytoskeleton. UNC-40, as well as the SAX-3 (Robo) and

199 VAB-1 (Eph) receptors, has been shown to polarize the distribution of F-actin in cells

200 (BERNADSKAYA *et al.* 2012). Reflecting the dynamic morphological changes that occurs as

201 the HSN axon forms, the site of asymmetric UNC-40::GFP localization fluctuates in the

202 neurites and along the ventral surface of the neuron (KULKARNI *et al.* 2013). Measurements

203 of growth cone size, maximal length, and duration of growth cone filopodia indicate that

204 UNC-6, UNC-40, and UNC-5 control the dynamics of protrusion (NORRIS AND LUNDQUIST

205 2011).

206

207 We observe that in *unc-5* mutants, the patterns of extension are altered. In wild-type

208 animals at the L1 stage of development most HSN neurons extends more than one short

209 neurite, however in *unc-5(e53)* mutants nearly half the neurons do not extend a process

210 (Figures 1A and 1B). Further, we find that *sax-3* is required for this suppression as most

211 neurons will extend in *unc-5(e53);sax-3(ky200)* mutants. During the L2 stage in wild-type  
212 animals a prominent ventral leading edge forms and the cell body undergoes a short ventral  
213 migration that is completed by the L3 stage, however in *unc-5* mutants a single large ventral  
214 process may form early during the L2 stage and the cell body may fail to migrate (Figures  
215 1A, 1C and 1E). It may be that the ventral migration of the HSN cell body requires the  
216 development of a large leading edge with multiple extensions. Together the observations  
217 indicate that loss of *unc-5* function affects the patterning of outgrowth, *i.e.* the timing, length,  
218 and number of extensions that form. Loss of *unc-5* function does not prevent movement, in  
219 fact, a single large ventral extension can form in the mutant at a time that is even earlier  
220 than when a single ventral extension can be observed in wildtype.

221

222 We tested four different *unc-5* alleles in these experiments. The *unc-5(e53)* allele is a  
223 putative molecular null allele, *unc-5(e480)* is predicted to truncate UNC-5 after the  
224 cytoplasmic ZU-5 domain and before the Death Domain, *unc-5(e152)* is predicted to  
225 truncate UNC-5 before the ZU-5 domain and Death Domain, and *unc-5(ev585)* is a  
226 missense allele that affects a predicted disulfide bond in the extracellular Ig(C) domain  
227 (KILLEEN *et al.* 2002). Although both the *unc-5(e480)* and *unc-5(e152)* are predicted to  
228 cause premature termination of protein translation in the cytodomain, the *unc-5(e152)*  
229 retains the signaling activity that prevents these phenotypes. Based on other phenotypes,  
230 previous studies reported that the *unc-5(e152)* allele retains UNC-40-dependent signaling  
231 functions (MERZ *et al.* 2001; KILLEEN *et al.* 2002).

232

233 **UNC-5 is required for the induction of multiple HSN axons by UNC-6 $\Delta$ C and a *mig-15***  
234 **mutation**

235 The results above suggest that UNC-5 activity can regulate the number of HSN extensions  
236 that will form. Previously we reported that expression of the N-terminal fragment of UNC-6,  
237 UNC-6 $\Delta$ C, induces excessive branching of ventral nerve cord motor neurons and that UNC-  
238 5 can suppress this branching (LIM *et al.* 1999). We now report that HSN develops an extra  
239 process in response to UNC-6 $\Delta$ C and that UNC-5 suppresses the development of the extra  
240 process (Figures 1D and 1F). Because HSN processes are guided ventrally by UNC-6 $\Delta$ C  
241 even when UNC-5 is not present, UNC-5 does not alter HSN axon guidance. Further,  
242 because loss of UNC-5 function reduces the number of HSN processes that form and  
243 genetic data suggests that UNC-6 $\Delta$ C induces additional processes by altering intracellular  
244 signaling (WANG AND WADSWORTH 2002), we surmise that UNC-5 signaling plays a cell-  
245 autonomous role within HSN to regulate intracellular signaling that affects branching. In  
246 support of suppression through cell-autonomous signaling, we also find that the UNC-6 $\Delta$ C  
247 phenotype is suppressed by *mig-10(ct141)* (Figures 1F). MIG-10 (lamellipodin) is a  
248 cytoplasmic adaptor protein that promotes HSN extensions (CHANG *et al.* 2006; QUINN *et al.*  
249 2006).

250

251 We find that a *mig-15* mutation also causes extra HSN processes and that the loss of UNC-  
252 5 function suppresses the extra HSN processes (Figures 1F and 1G). MIG-15 (NIK kinase)  
253 is cytoplasmic protein and evidence indicates that *mig-15* functions cell-autonomously to  
254 mediate a response to UNC-6 (POINAT *et al.* 2002; TEULIÈRE *et al.* 2011). It's been proposed  
255 that *mig-15* acts in the same pathway as *unc-5* to polarize the growth cone in response to  
256 the UNC-6 (TEULIÈRE *et al.* 2011). Mutations in *mig-15* are known to affect axon  
257 development, as well as Q neuroblast polarity and migration (POINAT *et al.* 2002; SHAKIR *et*  
258 *al.* 2006; TEULIÈRE *et al.* 2011; YANG *et al.* 2014). MIG-15 regulates the intracellular  
259 localization of UNC-40 in HSN (YANG *et al.* 2014). In our experiments we used the *mig-*

260 *15(rh148)* allele, which causes a missense mutation in the ATP-binding pocket of the kinase  
261 domain and is a weak allele of *mig-15* (SHAKIR *et al.* 2006; CHAPMAN *et al.* 2008).

262

263 **UNC-5 is required for ALM and AVM branching and extension, and for PLM**  
264 **overextension**

265 The *mig-15* results suggest that altering *mig-15* function creates a sensitized genetic  
266 background. That is, the *unc-5(ev480)* mutation suppresses HSN outgrowth extension in  
267 both the wild-type and *mig-15(rh148)* backgrounds, but the *mig-15* mutation creates a  
268 stronger patterning phenotype. We examined whether UNC-5 might affect the outgrowth  
269 patterning of other neurons in the *mig-15* mutants. We examined the patterning of the ALM  
270 and AVM extensions at the nerve ring and found that genetic interactions involving *unc-5*,  
271 *unc-40*, and *mig-15* affect outgrowth patterning (Figures 2A, 2B, and 2C). The AVM axon  
272 in *mig-15(rh148);unc-5(e53)* mutants often fails to extend anteriorly from the branch point  
273 and only extends into the nerve ring, or it fails to extend into the nerve ring and only extends  
274 anteriorly, or it fails to do both and terminates at this point. The axon often fails to branch  
275 into the nerve ring in *unc-40(e1430)* mutants, although it extends anteriorly. By comparison,  
276 in *unc-40(e1430);mig-15(rh148)* mutants more axons extend into the nerve ring, but fewer  
277 extend anteriorly.

278

279 It was previously reported that in *rpm-1* mutants the PLM axon will overextend in the  
280 anterior direction and that this phenotype can be suppressed by *sax-3* and *unc-5* mutations  
281 (LI *et al.* 2008).

282 This indicates that UNC-5 can also suppress outgrowth in the anterior direction, which is  
283 perpendicular to the ventral UNC-6 sources. We now observe that in *mig-15(rh148)*

284 mutants the PLM axon also often fails to terminate at its normal position and instead  
285 extends beyond the ALM cell body. This overextension is suppressed in *unc-5(e53);mig-*  
286 *15(rh148)* and *unc-40(e1430);mig-15(rh148)* mutants (Figures 2D and 2E). In summary,  
287 the HSN, AVM, ALM, and PLM experiments show that the spatial extent of movement is  
288 altered by UNC-5 activity. This function is not dependent on the direction of outgrowth  
289 relative to the UNC-6 sources.

290

291 ***unc-5* acts with other genes to control the probability of HSN extension in each**  
292 **direction**

293 We have observed that in certain mutants the direction of outgrowth from the HSN cell body  
294 can vary (XU *et al.* 2009; KULKARNI *et al.* 2013; TANG AND WADSWORTH 2014; YANG *et al.*  
295 2014). The different directions from which the axon projects from the HSN cell body can be  
296 scored to create a probability distribution for the direction of movement. The probability  
297 distribution gives an approximation of how much the direction of outgrowth fluctuates. To  
298 understand how the fluctuation could affect outgrowth movement, a random walk model is  
299 used. Random walks describe movement that occurs as a series of steps in which the  
300 angles and the distances between each step is decided according to some probability  
301 distribution. By using the probability distribution obtained from a mutant for each step of a  
302 random walk, and by keeping the distance of each step equal, a random walk can be  
303 constructed (Figure 3A). In effect, this method applies the probability distribution to discrete  
304 particles having idealized random walk movement on a lattice. By plotting random walks  
305 derived from wild-type animals and different mutants, the relative effect that mutations have  
306 on random walk movement can be visualized. For example, Figure 1B shows 50 tracks of  
307 500 steps for wild type and two mutants (mutant A is *unc-5(e53)* and mutant B is *egl-*  
308 *20(n585);sax-3(ky123)*). One property of movement that this method can reveal is the effect

309 that a mutation has on the displacement of movement. After 500 steps the displacement  
310 from the origin (0,0) is on average less for mutant A than for wild type, and less for mutant B  
311 than for wild type or mutant A. In an extending neuron, mass (the molecular species) are  
312 sustained at the leading edge. The assay compares the effect that different mutations  
313 would have on the movement of mass at the leading edge of an extension if the conditions  
314 of the system were kept constant. Of course, *in vivo* the conditions are not constant. For  
315 one, as an extension moves it will encounter new environments where the cues may be new  
316 or at different concentrations, all of which affect the probability distribution. As such, the  
317 graphs do not predict the actual movements of migrating axons, but rather show the relative  
318 effect that a mutation has on the movement of outgrowth.

319

320 For different strains, we score whether the HSN axon forms in the dorsal, anterior, posterior,  
321 or ventral direction (Table 1). Using our assay, we compared the effects that a mutation has  
322 on the properties of movement. In wild-type animals, there is a high probability for  
323 outgrowth in the ventral direction. The analysis shows that conditions in wild-type create  
324 nearly straight-line movement, *i.e.* if the same random walk is repeatedly done for the same  
325 number of steps, starting at the same origin, the final position of the walk along the x axis  
326 does not vary too much. In comparison, we find that a mutation can create random walk  
327 movement in which the final position is more varied. This variation occurs because the  
328 mutation increases the probability of outgrowth in other directions during axon formation.  
329 For each mutation, we simulate 50 random walks of 500 steps and derive the mean and  
330 standard deviation of the final position along the X axis. To compare strains, we plot the  
331 normal distribution, setting the mean at the same value for each. The difference between  
332 the curve for a mutant and wild type shows the degree to which the mutation caused the  
333 direction of outgrowth to fluctuate.



334

335 The results reveal three different distribution patterns (Figure 4). One class is the wild-type  
336 distribution, which has the distribution curve with the highest peak. The second class  
337 comprises *unc-5*, *egl-20*, *unc-53*, and *unc-6* in which the distribution curve is flatter than the  
338 wild-type curve. The third class has the flattest distribution curve and comprises the double  
339 combinations of *unc-5*, *egl-20*, *unc-53*, and *unc-6* as well as *madd-2*, *sax-3*, and *mig-15*.  
340 This class indicates the greatest degree of fluctuation. Loss of both *unc-6* and *egl-20*  
341 function causes this state, as well as loss of *unc-6* and *unc-5*, or *egl-20* and *unc-5*. The  
342 ability to cause the direction of movement to fluctuate is not associated with a specific  
343 direction of advection. For example, *unc-5;sax-3*, *unc-53;unc-6*, *unc-40;egl-20*, and *madd-*  
344 *2;sax-3* each show a widely dispersed pattern but the direction is ventral, dorsal, anterior,  
345 and posterior, respectively.

346

347 Mean squared displacement (MSD) is a measurement of the spatial extent of random  
348 motion. The MSD can be calculated from the random walk data. Plotting MSD as a  
349 function of the time interval shows how much an object displaces, on average, in a given  
350 interval of time, squared (Figure 5A). The results show that loss of UNC-6, UNC-5, or UNC-  
351 40 alters the MSD. For normal molecular diffusion the slope of the MSD curve is directly  
352 related to the diffusion coefficient. In cell migration models this value is referred to as the  
353 random motility coefficient. Coefficients are experimentally determined; they describe how  
354 long it takes a particular substance to move through a particular medium. We determine  
355 this value in order to numerically compare how the mutations can alter displacement relative  
356 to wild type (Figure 5B). The value is reduced in *unc-5*, *egl-20*, *unc-53*, and *unc-6* mutants,  
357 but not as much as in the other mutants, including those with double mutations.

358

359 ***unc-5* acts with other genes to control the probability of asymmetric UNC-40 receptor**  
360 **localization at each side of the HSN neuron**

361 UNC-40::GFP becomes localized to the ventral side of HSN beginning in the early L2 stage,  
362 whereas in *unc-6* loss-of-function mutants UNC-40::GFP is uniformly dispersed around the  
363 periphery of HSN (ADLER *et al.* 2006; KULKARNI *et al.* 2013). In *unc-53(n152); unc-5(e53)*  
364 mutants UNC-40::GFP localization is similar to that observed in *unc-6(ev400)* or *unc-5(e53)*;  
365 *unc-6(ev400)* mutants, *i.e.* asymmetric UNC-40::GFP localization is not observed. In both  
366 *unc-53(n152)* and *unc-5(e53)* mutants UNC-40::GFP is asymmetrically localized, however  
367 there is a higher probability that the localization occurs at surfaces other than at the ventral  
368 surface (KULKARNI *et al.* 2013). These results show that there are genetic interactions  
369 among *unc-5*, *unc-6*, and *unc-53* that regulates UNC-40 asymmetric localization.

370

371 Robust clustering of UNC-40 is not a requirement for directed movement in response to  
372 UNC-6. Indeed, even though there is a ventral directional bias for outgrowth towards the  
373 UNC-6 source in *unc-53(n152); sax-3(ky200)* mutants, robust UNC-40::GFP asymmetric  
374 localization is not observed (TANG AND WADSWORTH 2014). The ventral bias in the *unc-*  
375 *53(n152); sax-3(ky200)* mutants is a response to UNC-6 since there is no ventral bias in *unc-*  
376 *53(n152); sax-3(ky200); unc-6(ev400)* mutants. Similarly, in *sax-3(ky200)* and *unc-*  
377 *5(e53); egl-20(n585)* mutants there is a ventral directional bias (Figure 4) but not robust  
378 asymmetric UNC-40::GFP localization (Figure 6). The ventral directional bias in these  
379 animals requires UNC-40 since in *unc-40(e1430); sax-3(ky200)* and *unc-40(e1430); egl-*  
380 *20(n585)* mutants the ventral bias is compromised (Figure 4). Our interpretation is that  
381 robust asymmetric UNC-40::GFP localization is a manifestation of the process that directs  
382 the outgrowth in one direction rather than a prerequisite for directed outgrowth. In the *unc-*  
383 *53(n152); sax-3(ky200)*, *sax-3(ky200)*, and *unc-5(e53); egl-20(n585)* mutants the direction of

384 outgrowth fluctuates enough so that strong clustering is not observed, but over time the bias  
385 creates ventral outgrowth.

386

387 We note that the HSN cell body can be misplaced posteriorly in *egl-20* mutants (WHANGBO  
388 AND KENYON 1999). This is a concern since the posterior environment might have different  
389 effects on extension and UNC-40::GFP asymmetric localization. However it was previously  
390 reported that the pattern of axon outgrowth extension is independent of the cell body  
391 position (KULKARNI *et al.* 2013). Moreover, the cell body is mispositioned in both *egl-*  
392 *20(n585)* and *unc-5(e53);egl-20(n585)* mutants but robust UNC-40::GFP asymmetric  
393 localization is only observed in *egl-20(n585)* mutants, suggesting that the lack of  
394 asymmetric localization in the *unc-5(e53);egl-20(n585)* mutants is due to *unc-5(e53)* rather  
395 than the position of the cell body.

396

397 MADD-2 is a cytoplasmic protein of the tripartite motif (TRIM) family that potentiates UNC-  
398 40 activity in response to UNC-6 (ALEXANDER *et al.* 2009; ALEXANDER *et al.* 2010; HAO *et al.*  
399 2010; MORIKAWA *et al.* 2011; SONG *et al.* 2011; WANG *et al.* 2014). MADD-2::GFP and F-  
400 actin colocalize with UNC-40::GFP clusters in the anchor cell (WANG *et al.* 2014). It's been  
401 reported that in *madd-2* mutants UNC-40 localizes normally in neurons (HAO *et al.* 2010;  
402 SONG *et al.* 2011). Although its also been reported that UNC-40 will abnormally localize to  
403 the anterior and posterior surfaces of HSN (KULKARNI *et al.* 2013). UNC-40 localization in  
404 *madd-2* mutants was also reported to be defective in the anchor cell (WANG *et al.* 2014).  
405 There could be various reasons for the discrepancy, including different criteria for  
406 localization, different cell types, and the different alleles of *madd-2* that were used. In an  
407 investigation for localization in HSN, the *madd-2(ky592)* allele was used. The *madd-*  
408 *2(ky592)* allele is a strong loss-of-function allele. The *madd-2(tr103)* allele has also been

409 used to show genetic interactions with *unc-40* and evidence indicates that this allele acts as  
410 a genetic null (ALEXANDER *et al.* 2010). We therefore decided to test the *madd-2(tr103)*  
411 allele in our UNC-40 localization assay. We find that this allele gives an even stronger  
412 phenotype, *i.e.* robust UNC-40 asymmetric localization is not observed and the localization  
413 is more uniform (Figure 6). This phenotype is similar to what is observe with *unc-6* and  
414 *sax-3* mutants (KULKARNI *et al.* 2013; TANG AND WADSWORTH 2014).

415

## 416 **Discussion**

417 In this paper we show that UNC-5 regulates the number and length of neuronal processes  
418 that a neuron can develop. We observe that *unc-5* loss-of-function mutations inhibit the  
419 development of multiple neurites during early outgrowth from HSN. They also suppress the  
420 development of extra HSN processes that are induced by a *mig-15* mutation or by  
421 expression of the N-terminal fragment of UNC-6. We also observe that *unc-5* mutations  
422 suppress the anterior overextension of the PLM axon that occurs in the *mig-15* mutant.  
423 Finally, in combination with the *mig-15* mutation, *unc-5* loss-of-function mutations affect the  
424 branching and extension of ALM and AVM axons at the nerve ring. In each of these cases,  
425 the pattern of outgrowth is altered by loss of UNC-5 function. We further show that UNC-5  
426 acts together with UNC-6, EGL-20, SAX-3, UNC-53, MIG-15, and MADD-2 to regulate UNC-  
427 40 asymmetric localization at a surface of HSN. Here we discuss a model to explain how  
428 UNC-5 could control these patterns of outgrowth by regulating UNC-40 asymmetric  
429 localization.

430

431 **A model for the role UNC-5 plays in patterning neuronal outgrowth.**

432 We have postulated that UNC-40 polarization is self-organizing and that the surface to  
433 which UNC-40 localizes and mediates outgrowth is stochastically determined (XU *et al.*  
434 2009; KULKARNI *et al.* 2013). Genetic evidence indicates that UNC-40 conformational  
435 changes induced by UNC-6 ligation trigger multiple signals to coordinate the polarization  
436 and orientation processes (XU *et al.* 2009).

437

438 Because the surface to which UNC-40 localizes is stochastically determined, for each  
439 surface there is a probability that UNC-40-mediated outgrowth will take place there (Figure  
440 7A). At any instance of time, extracellular cues govern this probability (KULKARNI *et al.* 2013;  
441 TANG AND WADSWORTH 2014; YANG *et al.* 2014). The machinery of UNC-40-mediated  
442 outgrowth creates forces that act on the membrane to cause extension and these forces act  
443 across the entire surface of the plasma membrane. Outgrowth extension can be envisioned  
444 as a series of steps, and at each step the extracellular cues control the probability  
445 associated with movement in a particular direction. Therefore, the cues control the degree  
446 to which the direction of movement fluctuates over time. Such movement can be  
447 mathematically described as a random walk, *i.e.* a succession of randomly directed steps  
448 (Figure 3A). In contrast to straight-line or ballistic movement, random walk movement is  
449 diffusive and a property of diffusive motion is that the mean square displacement grows  
450 proportionate to the time traveled (Figure 5A). Consequently, the more the direction of  
451 movement fluctuates, the shorter the distance of travel in a given amount of time (Figure  
452 7B). In the neuron, this diffusive motion occurs at the micro-scale at the membrane. An  
453 increase in diffusive motion at this scale might be observed at the macro-scale as a  
454 decrease in the relative rate of outgrowth. The patterns of outgrowth we observe are the  
455 product of all the probabilities for outgrowth that the extracellular cues determine at each  
456 instance of time.

457

458 The combined effect of the extracellular cues sets a bias that determines the direction of  
459 outgrowth over time. Any variation from this state causes a higher probability of outgrowth  
460 in other directions. However, this does not necessarily cause movement in a new direction  
461 over time, but rather may only increase the back and forth fluctuation that occurs  
462 perpendicular to the direction of outgrowth. As illustrated in Figure 7B, this fluctuation  
463 reduces the extent of outgrowth over time without changing the overall direction of  
464 outgrowth. Because extracellular cues are not uniformly distributed in the extracellular  
465 environment, we postulate that the degree to which the direction of movement fluctuates  
466 can vary across the surface of the neuron. We propose that this variation can cause  
467 different regions of the neuron's membrane to move in the same direction but at different  
468 rates.

469

470 It is worth noting that our model does not directly address the molecular mechanisms  
471 through which the genes function. Rather, the use of random walks is a statistical approach  
472 to understand how a gene influences the collective impact of all the underlying molecular  
473 mechanisms that drive outgrowth. It can be envisioned that the movement of an extension  
474 occurs through innumerable forces acting at the molecular level. The effect that each  
475 molecular event has on movement is not easily observe or measured. In fact, it may be that  
476 patterns of outgrowth can't be fully understood by only knowing the molecular mechanisms  
477 of outgrowth. Instead, the effects that molecular events collectively have on movement  
478 must be understood through a statistical model.

479

480 DCC (UNC-40) signaling occurs through different signaling complexes. One of these  
481 complexes involves DCC (UNC-40), UNC5 (UNC-5), and netrin-1 (UNC-6) (HONG *et al.*  
482 1999; GEISBRECHT *et al.* 2003; KRUGER *et al.* 2004; FINCI *et al.* 2014). Our HSN results  
483 show that loss of UNC-5 function decreases the probability of UNC-40-mediated outgrowth  
484 towards the UNC-6 source and increases the probability of UNC-40-mediated outgrowth in  
485 other directions (Table 1 and Figure 6). This promotes diffusive movement and, therefore,  
486 reduces the distance the membrane can travel in a given time (Figure 7A and 7B). We  
487 propose that UNC-5 is required for ventral extensions at the L1 stage and for the ventral  
488 migration of the cell body because it allows for a rate of outgrowth that is necessary for  
489 outward extensions to develop during this period of time (Figure 8A). Because movement is  
490 altered, the overall morphology of the HSN extension is abnormal, although the axon still  
491 develops and reaches the ventral nerve cord (Figure 1A).

492

493 The PLM neuron overextends in the *mig-15(rh148)* mutant and this overextension is  
494 suppressed by loss of UNC-40 or UNC-5 function (Figure 2D and 2E). In wildtype and in  
495 the *mig-15(rh148)* mutant, extracellular cues direct PLM outgrowth in the anterior direction.  
496 However, the normal extension of the PLM axon does not require UNC-40 or UNC-5  
497 (HEDGECOCK *et al.* 1990). This suggests that the *mig-15(rh148)* mutation promotes UNC-40  
498 and UNC-5 outgrowth activity and that in the *mig-15(rh148)* mutant UNC-40-mediated  
499 outgrowth activity is anteriorly directed. Similar to what is proposed for HSN, the loss of  
500 UNC-5 activity decreases the probability of UNC-40-mediated outgrowth in the anterior  
501 direction and increases the probability of UNC-40-mediated outgrowth in other directions.  
502 This promotes diffusive movement and reduces the distance outgrowth can travel in a given  
503 time (Figure 8A). The site of PLM axon termination may be set by the combined effect of all  
504 the extracellular cues at a particular location in the animal. Additional UNC-40 activity

505 triggered by the *mig-15(rh148)* mutation may be enough to negate this effect, whereas the  
506 additional loss of UNC-5 activity nullifies the UNC-40 effect because it disperses the UNC-  
507 40-mediated outgrowth activity in other directions. That is, the probability of outgrowth in  
508 each direction could be set to the wild-type state by redistributing the direction of UNC-40  
509 outgrowth activity.

510

511 The AVM axon branches to extend one process into the nerve ring and another anterior  
512 (Figure 2A). Our results indicate that extension into the nerve ring is dependent on UNC-40  
513 activity and that loss of UNC-5 activity in the *mig-15(rh148)* mutant prevents extension into  
514 the nerve ring (Figure 2A and 2B). Similar to what we propose for HSN and PLM, we  
515 suggest that the *mig-15(rh148)* mutation causes addition UNC-40 outgrowth activity. In the  
516 *mig-15(rh148); unc-5(e53)* mutant the probability of UNC-40-mediated outgrowth in different  
517 directions increases and causes diffusive movement in every direction, inhibiting the rate of  
518 growth both into the nerve ring and anteriorly (Figure 8A). The *mig-15(rh148)* and the *unc-*  
519 *40(e1430)* mutations each has slight effects on the anterior extension but in combination  
520 have a stronger phenotype, suggesting that each plays an independent role in anterior  
521 extension (Figure 2C).

522

523 Our results show that UNC-5 can regulate the number of HSN processes that extend  
524 towards the UNC-6 source. To explain this, we suggest that UNC-40 (DCC), UNC-5  
525 (UNC5), and UNC-6 (netrin) are part of an activator-inhibitor system (GIERER AND MEINHARDT  
526 1972; MEINHARDT AND GIERER 2000). In an activator-inhibitor system two substance act on  
527 each other. The activator stimulates its own production as well as produces an inhibitor that  
528 can repress the production of the activator. The inhibitor is able to diffuse more rapidly than  
529 the activator, which causes patterns of varying concentrations of activator and inhibitor.



530

531 We favor a model in which UNC-40 and UNC-5 are two substances that interact with each  
532 other (Figure 8B). This is consistent with evidence indicating that Netrin-1 binds  
533 simultaneously to two DCC (UNC-40) molecules or an UNC5/DCC complex (FINCI *et al.*  
534 2014). In our model, UNC-5 signaling acts as an activator and UNC-40 signaling acts as an  
535 inhibitor. The activator and inhibitor activities “diffuse” at different rates because of the  
536 recruitment of UNC-40 and UNC-5 to the plasma membrane occurs at different rates. This  
537 idea is consistent with imaging experiments of cells in culture which suggest that netrin-1  
538 (UNC-6) regulates the distribution of DCC (UNC-40) and UNC5B (UNC-5) at the plasma  
539 membrane (GOPAL *et al.* 2016). In these studies, netrin-1 (UNC-6) was shown to stimulate  
540 translocation of DCC (UNC-40) and UNC5B (UNC-5) receptors from intracellular vesicles to  
541 the plasma membrane and, further, the transported receptors were shown to localize at the  
542 plasma membrane (GOPAL *et al.* 2016).

543

544 We propose that signaling by UNC-6-ligated UNC-40 causes outgrowth activity and  
545 stimulates translocation of UNC-40 to the site (Figure 8B, step 1). If the outgrowth reaches  
546 a critical level of UNC-6 (Figure 8B, step 2), changes to the UNC-6/UNC-40/UNC-5 receptor  
547 complexes increases UNC-5 signaling (the activator). UNC-5 signaling inhibits UNC-40  
548 translocation to the site and increases the relative levels of UNC-5 (short-range  
549 autocatalytic). Locally, UNC-40-mediated outgrowth activity becomes more dispersed,  
550 resulting in a slower rate of outgrowth. As UNC-40 translocation to the leading edge is  
551 inhibited, the level of UNC-40 at flanking surfaces increases (Figure 8B, step 3). These  
552 UNC-40 levels inhibits UNC-5 signaling (long-range inhibition) and prevents the dispersion  
553 of UNC-40-mediated outgrowth activity, resulting in a faster rate of outgrowth at the flanking  
554 surfaces.

555

556 In this type of model, the reaction and diffusion rates of the substances influence the pattern  
557 that emerges. The *mig-15(rh148)* mutation and the expression of UNC-6 $\Delta$ C could alter the  
558 rate by which components of the UNC-6/UNC-40/UNC-5 receptor complexes interact or  
559 alter the rate of translocation of the components to the membrane, or both. In fact, cell  
560 culture experiments suggest Netrin VI-V (UNC-6 $\Delta$ C ) induces DCC and UNC5B  
561 colocalization, but not DCC recruitment (GOPAL *et al.* 2016). Moreover, mutations that  
562 suppress ectopic branching induced by UNC-6 $\Delta$ C expression affect members of second  
563 messenger systems which could influence the rates of UNC-40 and UNC-5 interactions and  
564 trafficking (WANG AND WADSWORTH 2002).

565

#### 566 **Genetic pathways for self-organizing UNC-40 asymmetric localization**

567 We suggest genetic pathways for the functional order of action regulating the self-  
568 organization of UNC-40 polarization. These pathways are based on whether or not in  
569 different mutants UNC-40::GFP is observed to localize to any side of the HSN neuron  
570 (Figure 6). A summary of the results is presented (Figure 9A). We observe that UNC-6 is  
571 required for robust asymmetric UNC-40 localization; in the absence of UNC-6 function UNC-  
572 40 remains uniformly distributed along the surface of the plasma membrane. The loss of  
573 both UNC-53 and UNC-5 function also results in a uniform distribution, however loss of  
574 either one alone does not. This suggests that UNC-53 and UNC-5 pathways act  
575 redundantly downstream of UNC-6 (Figure 9B). Moreover, we observe there is robust  
576 asymmetric UNC-40 localization when there is a loss of UNC-6 activity in addition to the loss  
577 of UNC-53 and UNC-5. This suggests a third pathway that is suppressed by UNC-6 when  
578 UNC-53 and UNC-5 activity are missing. Loss of both UNC-5 and UNC-6 does not allow

579 UNC-40 localization, whereas loss of both UNC-53 and UNC-6 does, therefore UNC-53,  
580 rather than UNC-5, acts with UNC-6 to suppress the third pathway.

581

582 UNC-40 becomes localized when EGL-20 activity is lost. As well, UNC-40 becomes  
583 localized when both EGL-20 and UNC-53 activities are lost. This is consistent with UNC-6  
584 promoting UNC-40 localization via the UNC-5 pathway. Loss of EGL-20 and UNC-5  
585 prevents UNC-40 localization. In these animals, the UNC-5 pathway is absent and UNC-6  
586 is present to blocks the third pathway, therefore the UNC-53 pathway that leads to UNC-40  
587 localization must require EGL-20, as well as UNC-6.

588

589 Loss of UNC-6 activity or loss of both UNC-6 and EGL-20 activity prevents localization,  
590 whereas loss of only EGL-20 does not. To explain this, we propose that when UNC-6 is  
591 lost, the third pathway, which would otherwise be activated by the loss of UNC-6, remains  
592 suppressed because EGL-20 activity promotes suppression via UNC-53 activity. This  
593 suppression also explains why loss of UNC-6 and UNC-5 activity does not cause  
594 localization.

595

596 Importantly, this genetic analysis indicates that netrin (UNC-6) and wnt (EGL-20) signaling  
597 are integrated to regulate self-organizing UNC-40 asymmetric localization. An implication of  
598 this result is that the extracellular concentrations of UNC-6 and EGL-20 could control the  
599 activation or inhibition of UNC-40-mediated outgrowth.

600

601

602 Table

603

604

Table 1. Direction of Axon Formation from the HSN Cell Body

|                                                | direction of axon protrusion |         |          |           |            | n   | reference                     |
|------------------------------------------------|------------------------------|---------|----------|-----------|------------|-----|-------------------------------|
|                                                | dorsal                       | ventral | anterior | posterior | multipolar |     |                               |
|                                                | %                            | %       | %        | %         | %          |     |                               |
| wild-type                                      | 0                            | 96±2    | 3±2      | 0         | 1±1        | 221 | (KULKARNI <i>et al.</i> 2013) |
| <i>unc-6(ev400)</i>                            | 2±2                          | 3±2     | 81±2     | 8±2       | 6±1        | 218 | (KULKARNI <i>et al.</i> 2013) |
| <i>unc-40(e1430)</i>                           | 2±1                          | 6±2     | 67±2     | 19±1      | 6±1        | 183 | (KULKARNI <i>et al.</i> 2013) |
| <i>unc-5(e53)</i>                              | 0                            | 75±3    | 19±2     | 1±1       | 5±1        | 245 | (YANG <i>et al.</i> 2014)     |
| <i>unc-53(n152)</i>                            | 0                            | 67±3    | 22±2     | 5±1       | 6±1        | 238 | (KULKARNI <i>et al.</i> 2013) |
| <i>sax-3(ky123)</i>                            | 2±1                          | 31±1    | 21±1     | 37±2      | 9±2        | 232 | (TANG AND WADSWORTH 2014)     |
| <i>sax-3(ky200)*</i>                           | 2±1                          | 32±1    | 19±2     | 42±3      | 5±2        | 198 | (TANG AND WADSWORTH 2014)     |
| <i>unc-5(e53);sax-3(ky200)</i>                 | 2±1                          | 40±3    | 24±2     | 28±2      | 6±1        | 120 |                               |
| <i>unc-5(e53);unc-6(ev400)</i>                 | 4±2                          | 5±3     | 59±4     | 22±4      | 9±1        | 201 |                               |
| <i>unc-5(e53);egl-20(n585)</i>                 | 3±1                          | 28±4    | 22±4     | 35±5      | 11±2       | 114 |                               |
| <i>unc-53(n152);unc-5(e53)</i>                 | 0                            | 19±1    | 62±2     | 17±1      | 3±1        | 224 | (KULKARNI <i>et al.</i> 2013) |
| <i>unc-53(n152);unc-6(ev400)</i>               | 24±2                         | 0       | 19±2     | 22±2      | 34±3       | 144 | (KULKARNI <i>et al.</i> 2013) |
| <i>unc-53(n152);sax-3(ky123)</i>               | 1±1                          | 47±3    | 24±2     | 23±5      | 6±3        | 207 | (TANG AND WADSWORTH 2014)     |
| <i>unc-40(e1430);unc-5(e53)</i>                | 5±1                          | 6±1     | 55±2     | 19±2      | 14±1       | 196 | (KULKARNI <i>et al.</i> 2013) |
| <i>unc-40(e1430);sax-3(ky200)*</i>             | 14±3                         | 2±1     | 40±2     | 35±3      | 9±4        | 191 | (TANG AND WADSWORTH 2014)     |
| <i>sax-3(ky200)*; unc-6(ev400)</i>             | 8±1                          | 8±2     | 49±3     | 20±5      | 14±2       | 211 | (TANG AND WADSWORTH 2014)     |
| <i>unc-53(n152);unc-5(e53);unc-6(ev400)</i>    | 23±2                         | 0       | 34±2     | 15±2      | 28±2       | 148 | (KULKARNI <i>et al.</i> 2013) |
| <i>unc-53(n152);sax-3(ky200)*;unc-6(ev400)</i> | 11±2                         | 2±1     | 33±4     | 30±3      | 25±5       | 189 |                               |
| <i>egl-20(n585)</i>                            | 0                            | 64±2    | 21±2     | 7±1       | 8±1        | 304 | (TANG AND WADSWORTH 2014)     |
| <i>egl-20(n585); unc-6(ev400)</i>              | 18±2                         | 0       | 43±2     | 15±2      | 24±2       | 205 | (TANG AND WADSWORTH 2014)     |
| <i>unc-40(e1430); egl-20(n585)</i>             | 6±2                          | 17±2    | 45±5     | 15±2      | 16±2       | 173 | (TANG AND WADSWORTH 2014)     |
| <i>egl-20(n585);sax-3(ky123)</i>               | 1±1                          | 12±2    | 39±2     | 39±1      | 8±3        | 177 | (TANG AND WADSWORTH 2014)     |
| <i>madd-2(tr103)</i>                           | 0                            | 19±2    | 55±5     | 17±4      | 8±2        | 179 |                               |
| <i>madd-2(ky592)</i>                           | 0                            | 52±2    | 43±2     | 5±1       | 0          | 95  |                               |
| <i>unc-5(e53);madd-2(tr103)</i>                | 3±1                          | 15±2    | 52±4     | 17±4      | 13±1       | 197 |                               |
| <i>madd-2(tr103);sax-3(ky123)</i>              | 2                            | 24±3    | 19±4     | 47±1      | 7±2        | 171 |                               |
| <i>unc-53(n152);madd-2(tr103)</i>              | 1±1                          | 15±2    | 43±2     | 17±1      | 24±4       | 148 |                               |
| <i>mig-15(rh326)</i>                           | 2±1                          | 15±1    | 24±3     | 11±3      | 48±8       | 131 | (YANG <i>et al.</i> 2014)     |

Numbers represent percentage value ± SEM.

\*Animals grown at the *sax-3(ky200)* restrictive temperature (25°C).

605

606 **References**

- 607 Adler, C. E., R. D. Fetter and C. I. Bargmann, 2006 UNC-6/Netrin induces neuronal  
608 asymmetry and defines the site of axon formation. *Nat Neurosci* 9: 511-518.
- 609 Alexander, M., K. K. Chan, A. B. Byrne, G. Selman, T. Lee *et al.*, 2009 An UNC-40 pathway  
610 directs postsynaptic membrane extension in *Caenorhabditis elegans*. *Development* 136:  
611 911-922.
- 612 Alexander, M., G. Selman, A. Seetharaman, K. K. Chan, S. A. D'Souza *et al.*, 2010 MADD-  
613 2, a homolog of the Opitz syndrome protein MID1, regulates guidance to the midline through  
614 UNC-40 in *Caenorhabditis elegans*. *Developmental Cell* 18: 961-972.
- 615 Asakura, T., K. Ogura and Y. Goshima, 2007 UNC-6 expression by the vulval precursor  
616 cells of *Caenorhabditis elegans* is required for the complex axon guidance of the HSN  
617 neurons. *Dev Biol* 304: 800-810.
- 618 Bernadskaya, Y. Y., A. Wallace, J. Nguyen, W. A. Mohler and M. C. Soto, 2012 UNC-  
619 40/DCC, SAX-3/Robo, and VAB-1/Eph polarize F-actin during embryonic morphogenesis by  
620 regulating the WAVE/SCAR actin nucleation complex. *PLoS Genet* 8: e1002863.
- 621 Bhat, J. M., and H. Hutter, 2016 Pioneer Axon Navigation Is Controlled by AEX-3, a  
622 Guanine Nucleotide Exchange Factor for RAB-3 in *Caenorhabditis elegans*. *Genetics*.
- 623 Chan, S. S., H. Zheng, M. W. Su, R. Wilk, M. T. Killeen *et al.*, 1996 UNC-40, a *C. elegans*  
624 homolog of DCC (Deleted in Colorectal Cancer), is required in motile cells responding to  
625 UNC-6 netrin cues. *Cell* 87: 187-195.
- 626 Chang, C., C. E. Adler, M. Krause, S. G. Clark, F. B. Gertler *et al.*, 2006 MIG-  
627 10/Lamellipodin and AGE-1/PI3K Promote Axon Guidance and Outgrowth in Response to  
628 Slit and Netrin. *Curr Biol* 16: 854-862.
- 629 Chapman, J. O., H. Li and E. A. Lundquist, 2008 The MIG-15 NIK kinase acts cell-  
630 autonomously in neuroblast polarization and migration in *C. elegans*. *Dev Biol* 324: 245-  
631 257.
- 632 Finci, L. I., N. Krüger, X. Sun, J. Zhang, M. Chegkazi *et al.*, 2014 The crystal structure of  
633 netrin-1 in complex with DCC reveals the bifunctionality of netrin-1 as a guidance cue.  
634 *Neuron* 83: 839-849.
- 635 Geisbrecht, B. V., K. A. Dowd, R. W. Barfield, P. A. Longo and D. J. Leahy, 2003 Netrin  
636 binds discrete subdomains of DCC and UNC5 and mediates interactions between DCC and  
637 heparin. *J Biol Chem* 278: 32561-32568.

- 638 Gierer, A., and H. Meinhardt, 1972 A theory of biological pattern formation. *Kybernetik* 12:  
639 30-39.
- 640 Gopal, A. A., B. Rappaz, V. Rouger, I. B. Martyn, P. D. Dahlberg *et al.*, 2016 Netrin-1-  
641 Regulated Distribution of UNC5B and DCC in Live Cells Revealed by TICCS. *Biophys J*  
642 110: 623-634.
- 643 Hao, J. C., C. E. Adler, L. Mebane, F. B. Gertler, C. I. Bargmann *et al.*, 2010 The tripartite  
644 motif protein MADD-2 functions with the receptor UNC-40 (DCC) in Netrin-mediated axon  
645 attraction and branching. *Dev Cell* 18: 950-960.
- 646 Hedgecock, E. M., J. G. Culotti and D. H. Hall, 1990 The *unc-5*, *unc-6*, and *unc-40* genes  
647 guide circumferential migrations of pioneer axons and mesodermal cells on the epidermis in  
648 *C. elegans*. *Neuron* 4: 61-85.
- 649 Hong, K., L. Hinck, M. Nishiyama, M. M. Poo, M. Tessier-Lavigne *et al.*, 1999 A ligand-gated  
650 association between cytoplasmic domains of UNC5 and DCC family receptors converts  
651 netrin-induced growth cone attraction to repulsion. *Cell* 97: 927-941.
- 652 Keleman, K., and B. J. Dickson, 2001 Short- and long-range repulsion by the *Drosophila*  
653 *Unc5* netrin receptor. *Neuron* 32: 605-617.
- 654 Killeen, M., J. Tong, A. Krizus, R. Steven, I. Scott *et al.*, 2002 UNC-5 function requires  
655 phosphorylation of cytoplasmic tyrosine 482, but its UNC-40-independent functions also  
656 require a region between the ZU-5 and death domains. *Dev Biol* 251: 348-366.
- 657 Kruger, R. P., J. Lee, W. Li and K. L. Guan, 2004 Mapping netrin receptor binding reveals  
658 domains of *Unc5* regulating its tyrosine phosphorylation. *J Neurosci* 24: 10826-10834.
- 659 Kulkarni, G., Z. Xu, A. M. Mohamed, H. Li, X. Tang *et al.*, 2013 Experimental evidence for  
660 UNC-6 (netrin) axon guidance by stochastic fluctuations of intracellular UNC-40 (DCC)  
661 outgrowth activity. *Biol Open* 2: 1300-1312.
- 662 Leung-Hagesteijn, C., A. M. Spence, B. D. Stern, Y. Zhou, M. W. Su *et al.*, 1992 UNC-5, a  
663 transmembrane protein with immunoglobulin and thrombospondin type 1 domains, guides  
664 cell and pioneer axon migrations in *C. elegans*. *Cell* 71: 289-299.
- 665 Levy-Strumpf, N., and J. G. Culotti, 2007 VAB-8, UNC-73 and MIG-2 regulate axon polarity  
666 and cell migration functions of UNC-40 in *C. elegans*. *Nat Neurosci* 10: 161-168.
- 667 Levy-Strumpf, N., and J. G. Culotti, 2014 Netrins and Wnts function redundantly to regulate  
668 antero-posterior and dorso-ventral guidance in *C. elegans*. *PLoS Genet* 10: e1004381.

- 669 Levy-Strumpf, N., M. Krizus, H. Zheng, L. Brown and J. G. Culotti, 2015 The Wnt Frizzled  
670 Receptor MOM-5 Regulates the UNC-5 Netrin Receptor through Small GTPase-Dependent  
671 Signaling to Determine the Polarity of Migrating Cells. PLoS Genet 11: e1005446.
- 672 Li, H., G. Kulkarni and W. G. Wadsworth, 2008 RPM-1, a *Caenorhabditis elegans* protein  
673 that functions in presynaptic differentiation, negatively regulates axon outgrowth by  
674 controlling SAX-3/robo and UNC-5/UNC5 activity. J Neurosci 28: 3595-3603.
- 675 Lim, Y. S., S. Mallapur, G. Kao, X. C. Ren and W. G. Wadsworth, 1999 Netrin UNC-6 and  
676 the regulation of branching and extension of motoneuron axons from the ventral nerve cord  
677 of *Caenorhabditis elegans*. J Neurosci 19: 7048-7056.
- 678 Meinhardt, H., and A. Gierer, 2000 Pattern formation by local self-activation and lateral  
679 inhibition. Bioessays 22: 753-760.
- 680 Merz, D. C., H. Zheng, M. T. Killeen, A. Krizus and J. G. Culotti, 2001 Multiple signaling  
681 mechanisms of the unc-6/netrin receptors unc-5 and unc-40/dcc in vivo. Genetics 158:  
682 1071-1080.
- 683 Moore, S. W., M. Tessier-Lavigne and T. E. Kennedy, 2007 Netrins and their receptors. Adv  
684 Exp Med Biol 621: 17-31.
- 685 Morikawa, R. K., T. Kanamori, K. Yasunaga and K. Emoto, 2011 Different levels of the  
686 Tripartite motif protein, Anomalies in sensory axon patterning (*Asap*), regulate distinct  
687 axonal projections of *Drosophila* sensory neurons. Proc Natl Acad Sci U S A 108: 19389-  
688 19394.
- 689 Norris, A. D., and E. A. Lundquist, 2011 UNC-6/netrin and its receptors UNC-5 and UNC-  
690 40/DCC modulate growth cone protrusion in vivo in *C. elegans*. Development.
- 691 Pan, C. L., J. E. Howell, S. G. Clark, M. Hilliard, S. Cordes *et al.*, 2006 Multiple Wnts and  
692 frizzled receptors regulate anteriorly directed cell and growth cone migrations in  
693 *Caenorhabditis elegans*. Dev Cell 10: 367-377.
- 694 Poinat, P., A. De Arcangelis, S. Sookhareea, X. Zhu, E. M. Hedgecock *et al.*, 2002 A  
695 conserved interaction between beta1 integrin/PAT-3 and Nck-interacting kinase/MIG-15 that  
696 mediates commissural axon navigation in *C. elegans*. Curr Biol 12: 622-631.
- 697 Quinn, C. C., D. S. Pfeil, E. Chen, E. L. Stovall, M. V. Harden *et al.*, 2006 UNC-6/netrin and  
698 SLT-1/slit guidance cues orient axon outgrowth mediated by MIG-10/RIAM/lamellipodin.  
699 Curr Biol 16: 845-853.

- 700 Shakir, M. A., J. S. Gill and E. A. Lundquist, 2006 Interactions of UNC-34 Enabled with Rac  
701 GTPases and the NIK kinase MIG-15 in *Caenorhabditis elegans* axon pathfinding and  
702 neuronal migration. *Genetics* 172: 893-913.
- 703 Song, S., Q. Ge, J. Wang, H. Chen, S. Tang *et al.*, 2011 TRIM-9 functions in the UNC-  
704 6/UNC-40 pathway to regulate ventral guidance. *Journal of genetics and genomics = Yi*  
705 *chuan xue bao* 38: 1-11.
- 706 Tang, X., and W. G. Wadsworth, 2014 SAX-3 (Robo) and UNC-40 (DCC) Regulate a  
707 Directional Bias for Axon Guidance in Response to Multiple Extracellular Cues. *PLoS One*  
708 9: e110031.
- 709 Teulière, J., C. Gally, G. Garriga, M. Labouesse and E. Georges-Labouesse, 2011 MIG-15  
710 and ERM-1 promote growth cone directional migration in parallel to UNC-116 and WVE-1.  
711 *Development* 138: 4475-4485.
- 712 Wadsworth, W. G., H. Bhatt and E. M. Hedgecock, 1996 Neuroglia and pioneer neurons  
713 express UNC-6 to provide global and local netrin cues for guiding migrations in *C. elegans*.  
714 *Neuron* 16: 35-46.
- 715 Wadsworth, W. G., and E. M. Hedgecock, 1996 Hierarchical guidance cues in the  
716 developing nervous system of *C. elegans*. *Bioessays* 18: 355-362.
- 717 Wang, Q., and W. G. Wadsworth, 2002 The C domain of netrin UNC-6 silences  
718 calcium/calmodulin-dependent protein kinase- and diacylglycerol-dependent axon branching  
719 in *Caenorhabditis elegans*. *J Neurosci* 22: 2274-2282.
- 720 Wang, Z., L. M. Linden, K. M. Naegeli, J. W. Ziel, Q. Chi *et al.*, 2014 UNC-6 (netrin)  
721 stabilizes oscillatory clustering of the UNC-40 (DCC) receptor to orient polarity. *J Cell Biol*  
722 206: 619-633.
- 723 Watari-Goshima, N., K. Ogura, F. W. Wolf, Y. Goshima and G. Garriga, 2007 *C. elegans*  
724 VAB-8 and UNC-73 regulate the SAX-3 receptor to direct cell and growth-cone migrations.  
725 *Nat Neurosci* 10: 169-176.
- 726 Whangbo, J., and C. Kenyon, 1999 A Wnt signaling system that specifies two patterns of  
727 cell migration in *C. elegans*. *Molecular cell* 4: 851-858.
- 728 Xu, Z., H. Li and W. G. Wadsworth, 2009 The roles of multiple UNC-40 (DCC) receptor-  
729 mediated signals in determining neuronal asymmetry induced by the UNC-6 (netrin) ligand.  
730 *Genetics* 183: 941-949.



731 Yang, Y., W. S. Lee, X. Tang and W. G. Wadsworth, 2014 Extracellular Matrix Regulates  
732 UNC-6 (Netrin) Axon Guidance by Controlling the Direction of Intracellular UNC-40 (DCC)  
733 Outgrowth Activity. PLoS One 9: e97258.

734

735 **Legends**

736 **Figure 1. UNC-5 regulates the patterning of outgrowth extensions from HSN. (A)**

737 Photomicrographs of HSN at the L1, L2, and adult stages in wild-type and *unc-5(e53)*  
738 mutants. In L1 and L2 animals neurite extensions (arrows) are often observed in wild-type  
739 animals but are more rare in *unc-5* mutants. The short ventral migration of the cell body that  
740 occurs in wild-type animal sometimes fails in *unc-5* mutants, leaving the cell body farther  
741 from the PLM axon (arrowhead) with a single longer ventral extension. The position of the  
742 cell body remains dorsal. Scale bar: 10  $\mu$ m. **(B)** The percentage of HSN neuron with 0, 1,  
743 or more than 1 neurite extension at the L1 stage. In *unc-5* mutants nearly half of the  
744 neurons do not extend a process. Error bars indicated the standard error mean; n values  
745 are indicated above each column. Significant differences (two-tailed t-test), \*P<0.001. **(C)**  
746 The percentage of HSN neurons with a single long extension at the L2 stage. Several *unc-*  
747 *5* alleles were tested as described in the text. In mutants with loss-of-function there is more  
748 often a single extension from the cell body and the cell body is dorsally mispositioned. **(D)**  
749 Photomicrographs of HSN at the early L4, late L4, and adult stages in wild-type and in  
750 animals expressing UNC-6 $\Delta$ C. The expression of UNC-6 $\Delta$ C induces multiple processes,  
751 most often two major extensions, that are guided ventrally. **(E)** The percentage of HSN  
752 neurons with a cell body mispositioned dorsally at the L2 stage. In loss-of-function mutants  
753 the cell body often fails to undertake a short ventral migration during the L2 stage. The  
754 migration is not delayed, but rather it remains dorsal. **(F)** The percentage of HSN neurons  
755 with multiple ventral extensions at the L4 stage. The additional processes induced by UNC-  
756  $\Delta$ C can be suppressed by *unc-5* and *mig-10* mutations. Additional processes induced by  
757 *mig-15(rh148)* can also be suppressed by the *unc-5* mutation. **(G)** Photomicrographs of  
758 HSN at adult stages in a *mig-15* mutant. Similar to UNC-6 $\Delta$ C expression, *mig-15* mutations  
759 can also cause additional processes that are guided ventrally (YANG *et al.* 2014).



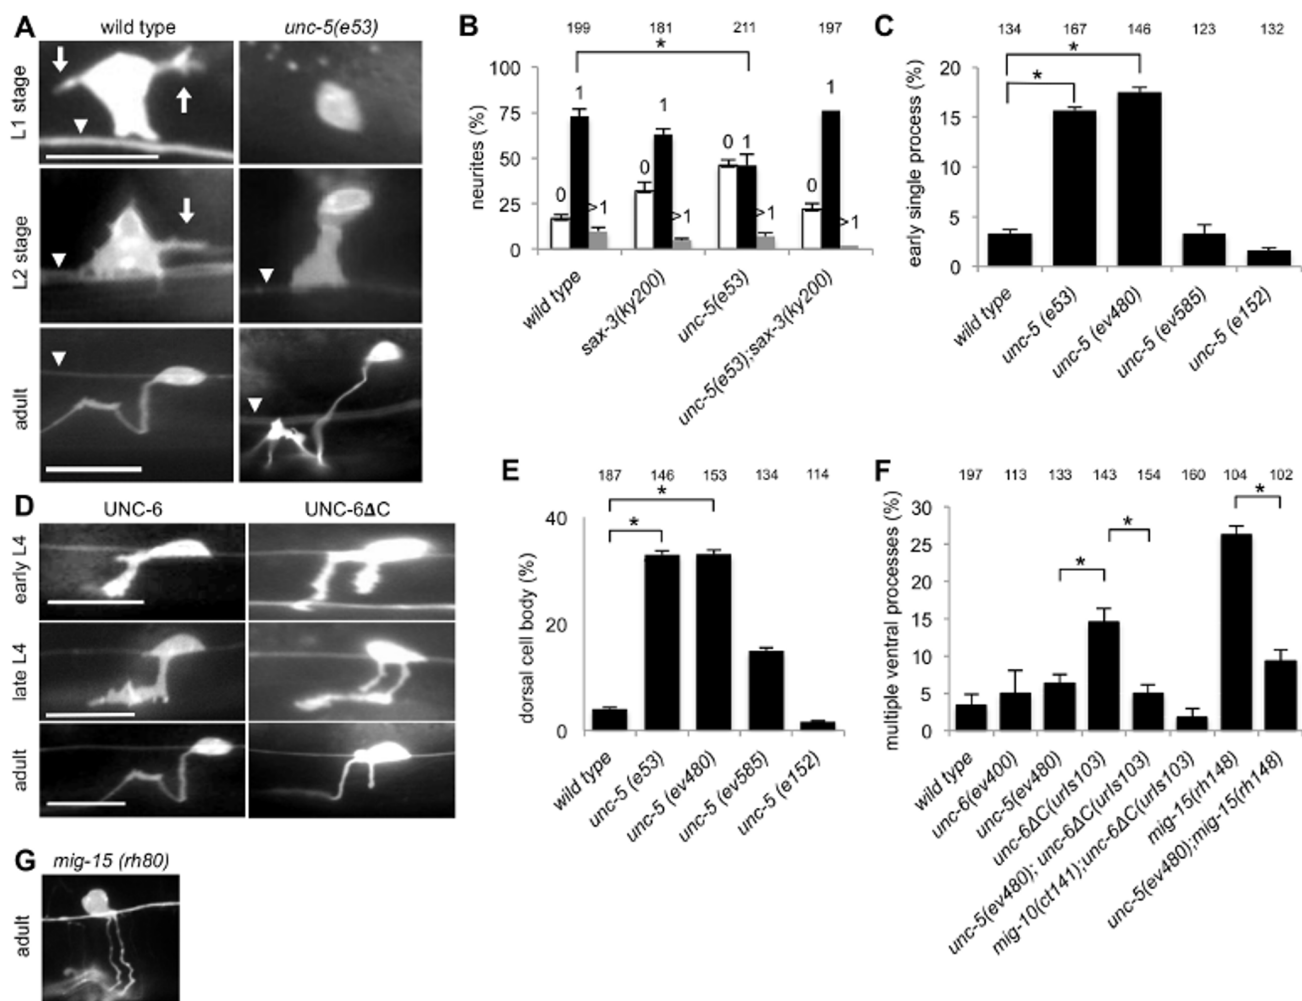

761

762

763 **Figure 2. UNC-5 regulates the patterning of extension from ALM, AVM, and PLM. (A)**  
764 Photomicrographs of the ALM and AVM neurons at the L4 stage in wild-type animals and  
765 mutants showing different patterns of outgrowth extension. In wild type (top) a single axon  
766 travels anteriorly to the nerve ring (arrowheads). At the nerve ring the axon branches; one  
767 branch extends further anteriorly and the other extends into the nerve ring. In mutants, one  
768 or both axons may only extend anteriorly and will not extend into the nerve ring (second  
769 from top). Or one or both axons will only extend into the nerve ring and will not extend  
770 anteriorly (third from top). Or one or both axons will fail to extend into either the nerve ring  
771 or anteriorly (bottom). Scale bar: 20  $\mu\text{m}$ . **(B)** The percentage of AVM neurons where the  
772 AVM neuron failed to extend into the nerve ring. The neuron often fails to extend in the *unc-*  
773 *40* and *mig-15;unc-5* mutants, whereas it does extend in the *mig-15*, *unc-5*, and *mig-15;unc-*  
774 *40* mutants. Error bars indicated the standard error mean; n values are indicated above  
775 each column. Significant differences (two-tailed t-test), \* $P < 0.001$ . **(C)** The percentage of  
776 AVM neurons where the AVM neuron failed to extend anteriorly, past the nerve ring. The  
777 neuron often fails to extend anteriorly in the *mig-15;unc-5* mutants, whereas it does extend  
778 in the *mig-15*, *unc-5*, *unc-40*, and *unc-40;mig-15* mutants. There is a significant difference  
779 between the *unc-40* and *unc-40;mig-15* mutants. **(D)** Photomicrographs of the ALM, AVM,  
780 and PLM neurons at the L4 stage in wild-type animals and *mig-15* mutants. In wild type  
781 (top) a single PLM axon travels anteriorly from the posterior cell body (not shown). Near the  
782 vulva (arrow) the axon branches; one branch extends to the ventral nerve chord and  
783 another extends anteriorly. The anterior extension terminates before reaching the area of  
784 the ALM cell body. In *mig-15* mutants the PLM can extend anteriorly past the ALM cell body  
785 (bottom). **(E)** The percentage of PLM neurons where the PLM neuron extend anteriorly  
786 past the ALM cell body. The anterior extension often over-extends in *mig-15* mutants. Loss  
787 of *unc-5* or *unc-40* function can suppress this phenotype.



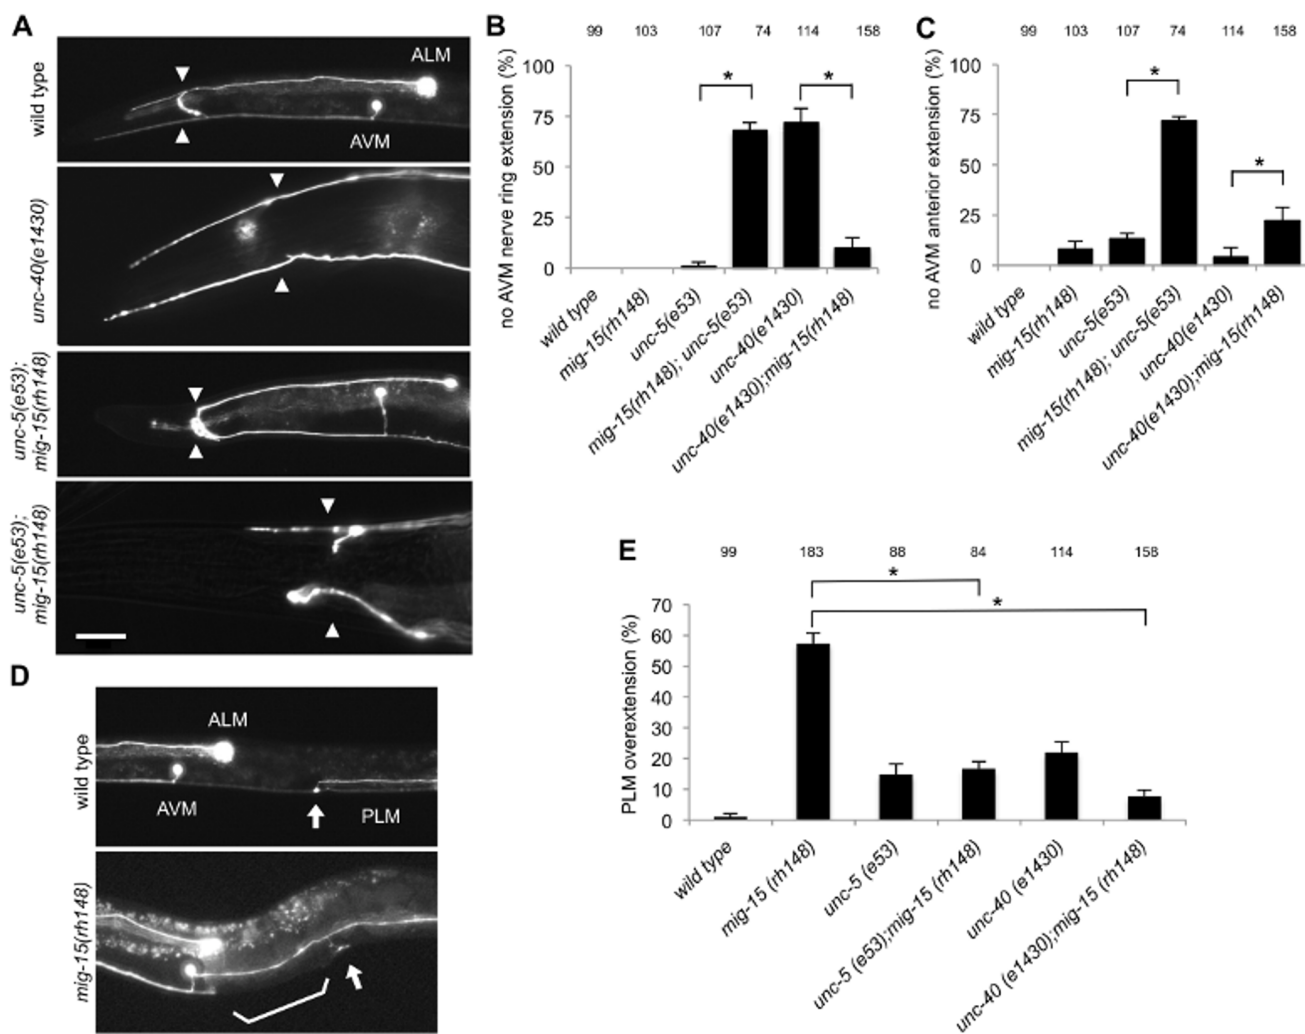

789

790

791 **Figure 3. Assay to measure the effects a mutation has on movement. (A)** The  
792 direction of outgrowth extension from the HSN cell body can vary and whether the axon  
793 developed in the dorsal, anterior, posterior, or ventral direction in L4 stage animals is scored  
794 (left panel). This creates a probability distribution in which the direction ( $X$ ) is a random  
795 variable (center panel). A simple random walk is generated by using the same probability  
796 distribution for a succession of steps with an equal time interval (right panel). **(B)** For wild  
797 type and two mutants, 50 simulated random walks of 500 steps were plotted from an origin  
798 (0,0). The results graphically indicate the directional bias for movement. For random walk  
799 movement created in mutant A (red, results from *unc-5(e53)*), the directional bias is shifted  
800 anteriorly (left) relative to wild type. The results also graphically show the displacement of  
801 movement. For random walk movement created in mutant B (blue, results from *egl-*  
802 *20(n585);sax-3(ky123)*), the average of the final position (displacement) from the origin is a  
803 much shorter distance than wild type. **(C)** Plots of the normal distribution of the final position  
804 along the x axis of the random walk tracks shown in B. The mean position for each is set at  
805 0. The plots graphically illustrate how random walks constructed from the probability  
806 distribution for the direction of outgrowth extensions can reveal a diffusion process.  
807



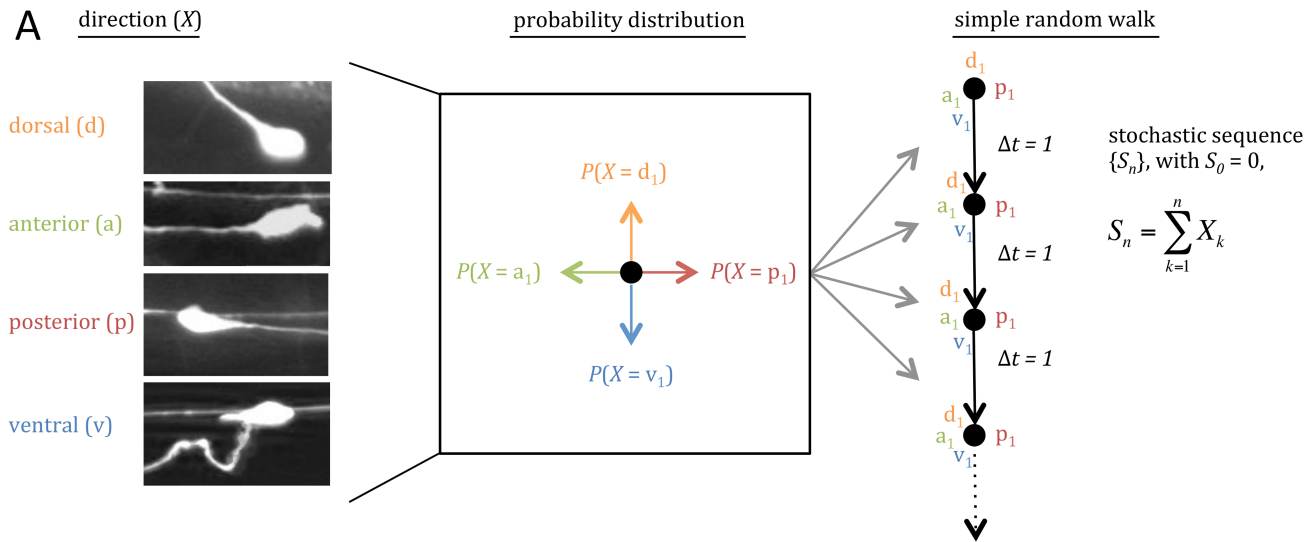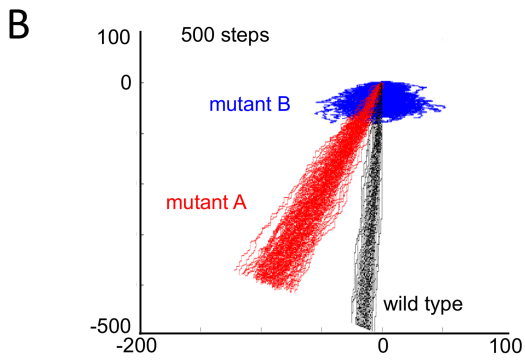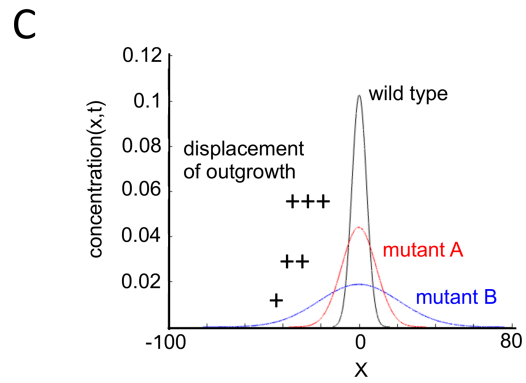

808

809

810 **Figure 4. Mutations have different effects on movement.** Examples of random walk  
811 analyses using the direction of axon development from the HSN neuron in different mutants  
812 (Table 1). The graphs were created as described in the figure legend of Figure 1. For each  
813 panel, plots are shown for the normal distribution of the final position along the x axis for the  
814 random walk tracks plotted in the inserts. The inserts depict the random walk movement that  
815 would be produced by the probability distribution for the direction of outgrowth in the mutant.  
816 Plots derived from the same data are colored alike. Each panel depicts the analyses of four  
817 different mutants and wild type. Three different distribution patterns are observed: (1) the  
818 wild-type distribution, which has the distribution curve with the highest peak; (2) the *unc-5*,  
819 *egl-20*, *unc-53*, and *unc-6* (not shown) distribution, which is flatter than the wild-type curve;  
820 (3) the *madd-2*, *sax-3*, *mig-15*, and double combinations, which have the flattest distribution  
821 curve.

822

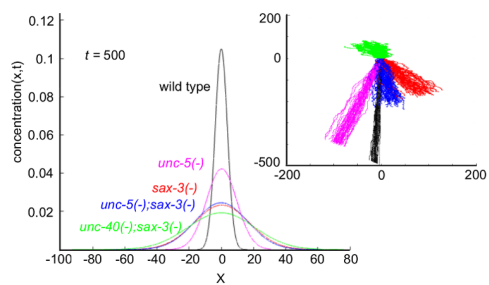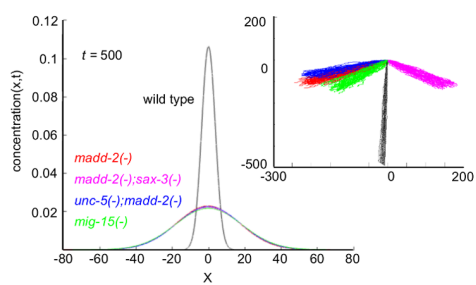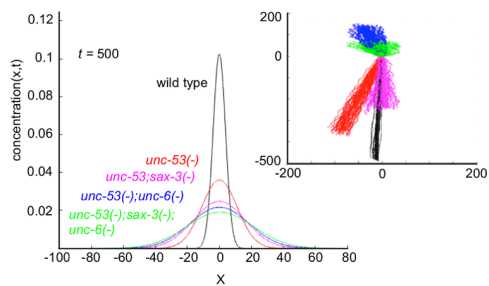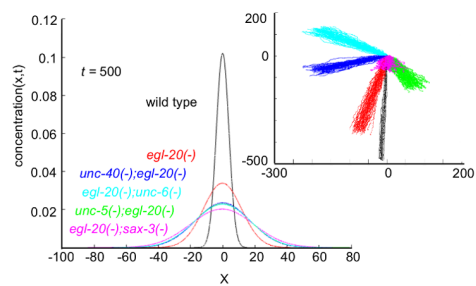

823

824

825 **Figure 5. Mutations alter the spatial extent of movement.** (A) Plotted are the mean  
826 squared displacement (MSD) curves as a function of time interval ( $dt$ ). The values are in  
827 arbitrary units, since the time scale was arbitrarily set at 1. The curves show the extent that  
828 different mutations can alter the MSD relative to wild type and the MSD caused by an  
829 unbiased random walk. For each time interval, mean and s.e.m. are plotted. (B) From the  
830 slope of MSD curves a coefficient can be derived that gives the relative rate of diffusion.  
831 Colored bars correspond to the like-colored curves given in panel A. The coefficients for  
832 *unc-5*, *egl-20*, *unc-53*, and *unc-6* form a class that is distinct from that derived from wild type  
833 and from the double mutants.  
834

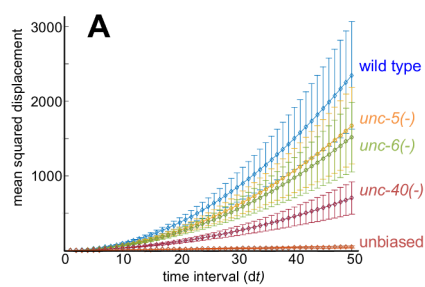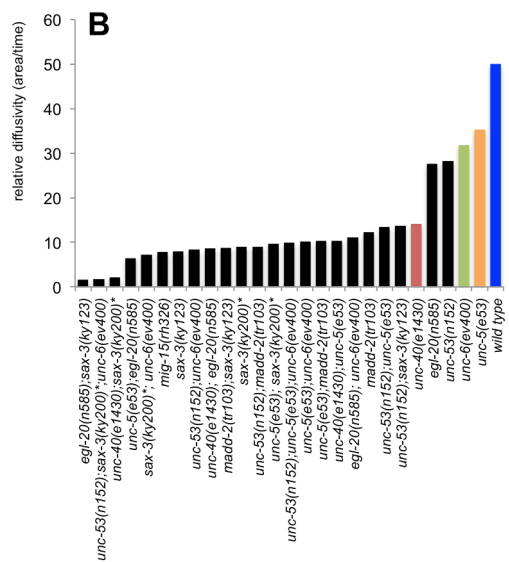

835

836

837 **Figure 6. Mutations affect asymmetric intracellular UNC-40::GFP localization. (A)**

838 Graph indicating the dorsal-ventral localization of UNC-40::GFP in HSN. The graph shows  
839 the average ratio of dorsal-to-ventral intensity from linescan intensity plots of the UNC-  
840 40::GFP signal around the periphery of the HSN cell. UNC-40::GFP is ventrally localized in  
841 wild-type, but the ratio is different in the mutants. Error bars represent standard error of  
842 mean. Below is a graphic representation of the possible UNC-40 localization patterns when  
843 the intensity ratio is  $\geq 1$  or is  $< 1$ . **(B)** Graph indicating the anterior-posterior localization of  
844 UNC-40::GFP. To determine orientation, line-scan intensity plots of the UNC-40::GFP  
845 signal across the dorsal periphery of the HSN cell were taken, the dorsal surface was  
846 geometrically divided into three equal segments, and the total intensity of each was  
847 recorded. The percent intensity was calculated for each segment and ANOVA was used to  
848 determine if there is a significant difference between the three segments (see Material and  
849 Methods). Whereas in the *unc-5* and *egl-20* mutants there is a bias for anterior or posterior  
850 localization, there is a uniform distribution in *unc-5;egl-20* double mutants. Uniform  
851 distribution is also observed in strong loss-of-function *sax-3* and *madd-2* mutants. (\*)  
852 Animals grown at the *sax-3(ky200)* restrictive temperature (25°C). Below is a graphic  
853 representation of the possible UNC-40 localization patterns.

854

A. Dorsal-ventral orientation of UNC-40 asymmetric localization

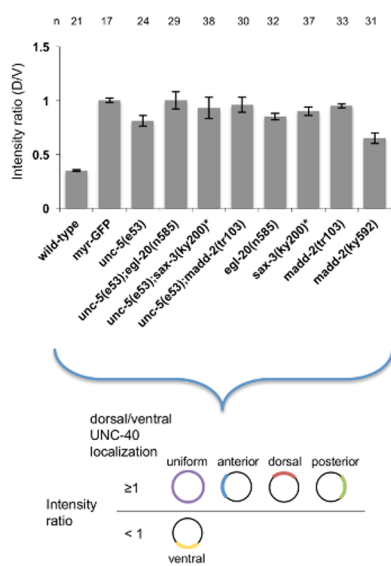

B. Anterior-posterior orientation of UNC-40 asymmetric localization

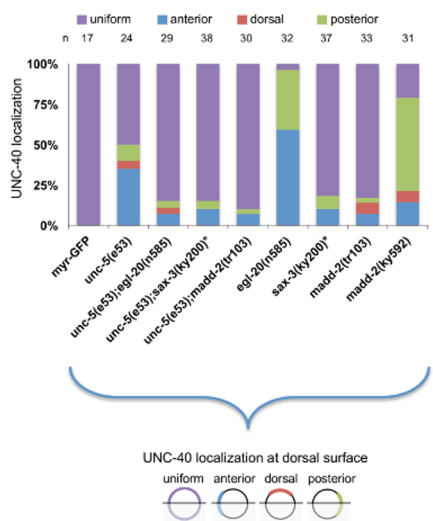

855

856

857 **Figure 7. Model for UNC-40 self-organizing polarization and random walk movement.**

858 **(A)** Along the plasma membrane, complexes comprising UNC-40 and UNC-5 interact with  
859 extracellular cues. A self-organizing process is triggered in which only some complexes  
860 emerge to mediate UNC-40 outgrowth activity. In wild-type animals (top) there is a high  
861 probability that complexes associated with specific levels of the extracellular cues will  
862 mediate outgrowth activity. Compared to wild-type, in animals with loss of UNC-5 function  
863 (bottom) the probability of these same complexes mediating outgrowth activity is lower and  
864 the probability that the other complexes instead will mediate outgrowth is higher. Direction is  
865 labeled left, down, and right, in reference to the orientation of the figure and to emphasize  
866 that the model is not referring to any specific cues or their sources in the animal. **(B)** Two  
867 sets of tracks are shown to compare random walk models derived from representative  
868 wildtype and mutant experimental results. Compared to wildtype, the mutant has a lower  
869 probability of outgrowth in one specific direction (down) and a higher probability of  
870 outgrowth in other directions (left and right). Using the probability distributions shown below  
871 the tracks, 50 simulated random walks of 500 steps were plotted from an origin. This  
872 comparison emphasizes that even though the direction of movement is the same, there is a  
873 difference in the average displacement. We propose this property of movement is  
874 manifested during neuronal extension in wildtype and mutant animals as a difference in the  
875 rate of outgrowth. In statistical physics, net movement through the action of random motion  
876 is diffusion. Here, each track models the trajectory that mass of the plasma membrane  
877 could move during extension. The probability density function of the position of the mass as  
878 a function of space and time is described by an advection-diffusion equation. In summary,  
879 we suggest that the advection-diffusion model can be used to describe the process by  
880 which mass at the leading edge of an extension is transported and that our results describe  
881 how genes regulate this transport.





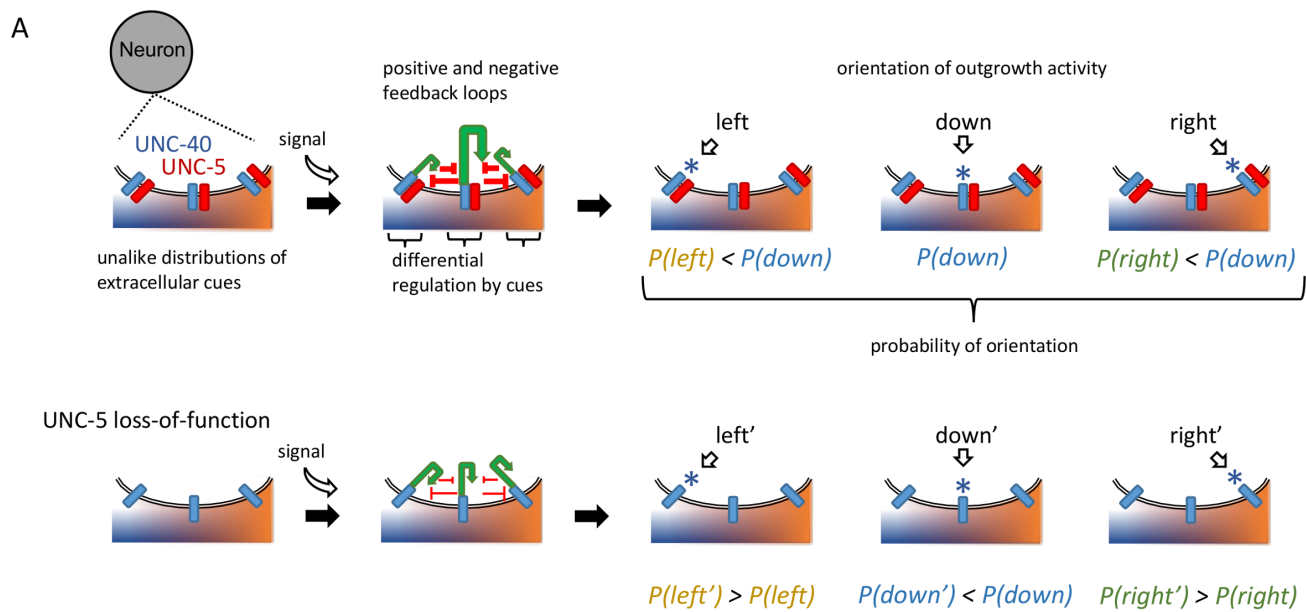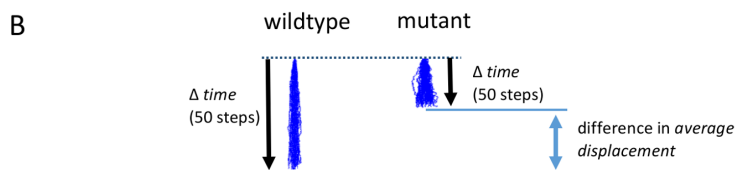

Example:

|                   |   |     |      |   |                    |
|-------------------|---|-----|------|---|--------------------|
| $P(\text{right})$ | = | 0.1 | 0.33 | = | $P(\text{right}')$ |
| $P(\text{left})$  | = | 0.1 | 0.33 | = | $P(\text{left}')$  |
| $P(\text{down})$  | = | 0.8 | 0.33 | = | $P(\text{down}')$  |

883

884

885 **Figure 8. Models for how UNC-5 could control the patterns of outgrowth by**  
886 **regulating random walk movement. (A)** Schematics of the phenotypic differences  
887 described in the text. A dashed line connects the schematic to a representative random  
888 walk movement model as described in Figure 7B. Our results describe a correlation  
889 between the mutant phenotype, which indicates an inhibition of outgrowth, and the random  
890 walk modeling, which indicates that the fluctuation in the direction of outgrowth activity  
891 observed in the mutant could cause the displacement of the movement of the membrane to  
892 decrease. **(B)** An activator-inhibitor model to explain how UNC-5 can regulate the number  
893 of processes that can extend in the same direction towards a source of UNC-6. Shown are  
894 three panels depicting outgrowth through a gradient of extracellular UNC-6. The UNC-6  
895 concentration gradient is depicted by the green color gradient on the right of each panel. In  
896 each succeeding panel the leading edge of the extension encounters a higher UNC-6  
897 concentration (solid horizontal line). The level of UNC-6 influences UNC-5 signaling, which  
898 in turn influences the rate of UNC-40 transport to the plasma membrane surface. UNC-5  
899 signaling also results in a decrease in the rate of outgrowth, as depicted by the random walk  
900 models below the extension. More specific details about this model are given in the text.  
901

A HSN ventral L1 extension

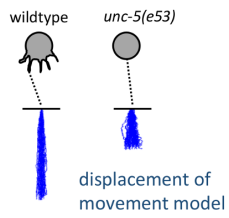

PLM anterior overextension

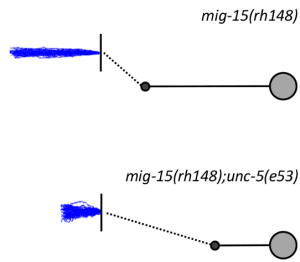

AVM nerve ring extension

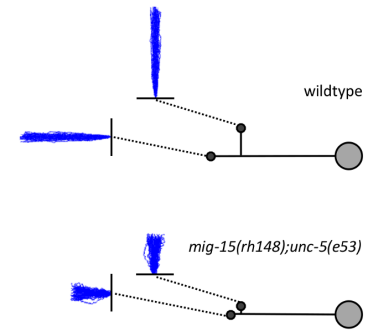

B

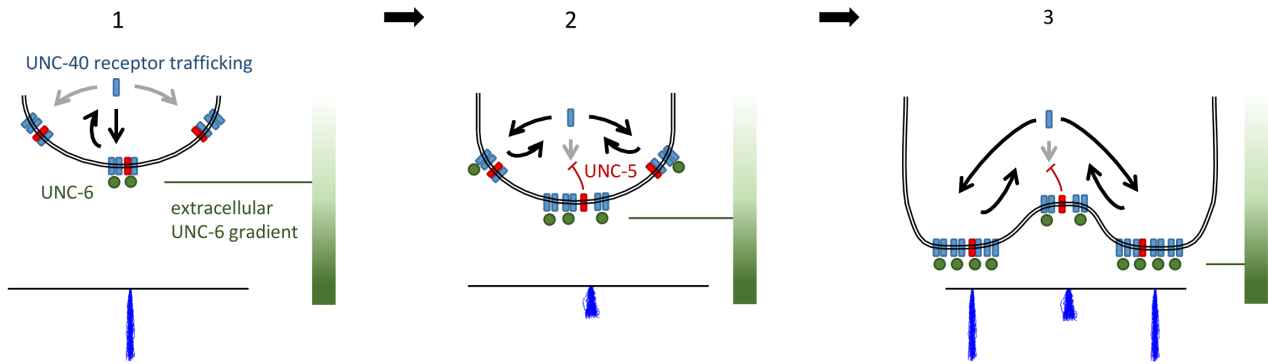

902

903

904 **Figure 9. Genetic pathways for self-organizing UNC-40 asymmetric localization. (A)**  
905 Table summarizing the results of experiments previously reported and described in Figure 6  
906 of this paper. **(B)** The genetic data support a model whereby the UNC-6 and EGL-20  
907 extracellular cues regulate at least three pathways leading to robust asymmetric UNC-40  
908 localization. Arrows represent activation; bars represent repression. See text for the logic  
909 used to construct the pathways.  
910

**A**

| loss-of-function                        | robust asymmetric UNC-40 localization | reference                  |
|-----------------------------------------|---------------------------------------|----------------------------|
| <i>unc-6</i>                            | no                                    | (Kulkarni et al., 2013)    |
| <i>unc-5</i>                            | yes                                   | (Kulkarni et al., 2013)    |
| <i>unc-5</i> <i>unc-6</i>               | no                                    | (Kulkarni et al., 2013)    |
| <i>unc-5</i> <i>egl-20</i>              | no                                    |                            |
| <i>unc-5</i> <i>sax-3</i>               | no                                    |                            |
| <i>unc-5</i> <i>unc-53</i>              | no                                    | (Kulkarni et al., 2013)    |
| <i>unc-5</i> <i>unc-53</i> <i>unc-6</i> | yes                                   | (Kulkarni et al., 2013)    |
| <i>unc-5</i> <i>unc-53</i> <i>sax-3</i> | no                                    |                            |
| <i>unc-5</i> <i>madd-2</i>              | no                                    |                            |
| <i>unc-6</i> <i>unc-53</i>              | yes                                   | (Kulkarni et al., 2013)    |
| <i>unc-6</i> <i>sax-3</i>               | no                                    | (Tang and Wadsworth, 2014) |
| <i>unc-6</i> <i>unc-53</i> <i>sax-3</i> | no                                    | (Tang and Wadsworth, 2014) |
| <i>egl-20</i>                           | yes                                   | (Kulkarni et al., 2013)    |
| <i>egl-20</i> <i>unc-53</i>             | yes                                   | (Kulkarni et al., 2013)    |
| <i>egl-20</i> <i>unc-6</i>              | no                                    | (Kulkarni et al., 2013)    |
| <i>egl-20</i> <i>sax-3</i>              | no                                    | (Tang and Wadsworth, 2014) |
| <i>sax-3</i>                            | no                                    | (Tang and Wadsworth, 2014) |
| <i>sax-3</i> <i>unc-53</i>              | no                                    | (Tang and Wadsworth, 2014) |
| <i>unc-53</i>                           | yes                                   | (Kulkarni et al., 2013)    |
| <i>madd-2</i>                           | no                                    |                            |
| <i>mig-15</i>                           | yes                                   | (Yang et al., 2014)        |

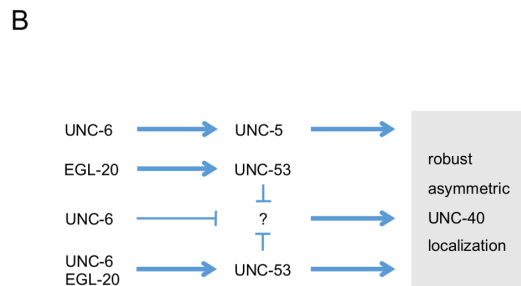

Source: http://biorxiv.org/content/10.1101/083436v1.full.pdf
